# Supplementary material for: Hypoxia induces radioresistance, epithelial-mesenchymal transition, cancer stem cell-like phenotype and changes in genes possessing multiple biological functions in head and neck squamous cell carcinoma
Source: PubMed Central journal article supplement — Oncol Rep. 2022 Jan 21;47(3):58. doi: 10.3892/or.2022.8269 (PMC8808704; doi:10.3892/or.2022.8269), 2022-01-21
Supplement: Supplementary_Data.pdf [file Supplementary_Data.pdf]

Figure S1. Effect of CDH2 downregulation on the response of hypoxic HNSCC cells to radiation. LK0858, LK0863 and UT-SCC-14 cells transfected with either non-targeting siRNA or siRNA targeting CDH2 were exposed to hypoxia for 24 h prior to transfection and returned to hypoxic conditions after transfection. Expression of CDH2 was evaluated 48 h post-transfection using reverse transcription-quantitative PCR (LK0858 and LK0863) or western blotting (UT-SCC-14). In parallel experimental settings, LK0858, LK0863 and UT-SCC-14 cells were irradiated at 2, 4 or 6 Gy 24 h post-transfection with respective siRNAs, followed by re-exposure to hypoxic conditions (1% O<sub>2</sub>). After 9 days, the cytotoxic/cytostatic effect on cell proliferation was determined by a crystal violet assay. Cell proliferation is presented as the percentage of the untreated controls, and the data are presented as the mean ± SD from three experiments performed in triplicate. \*P<0.05. The data was analyzed using Student's t-test. CDH2, cadherin 2; siRNA, small interfering RNA.

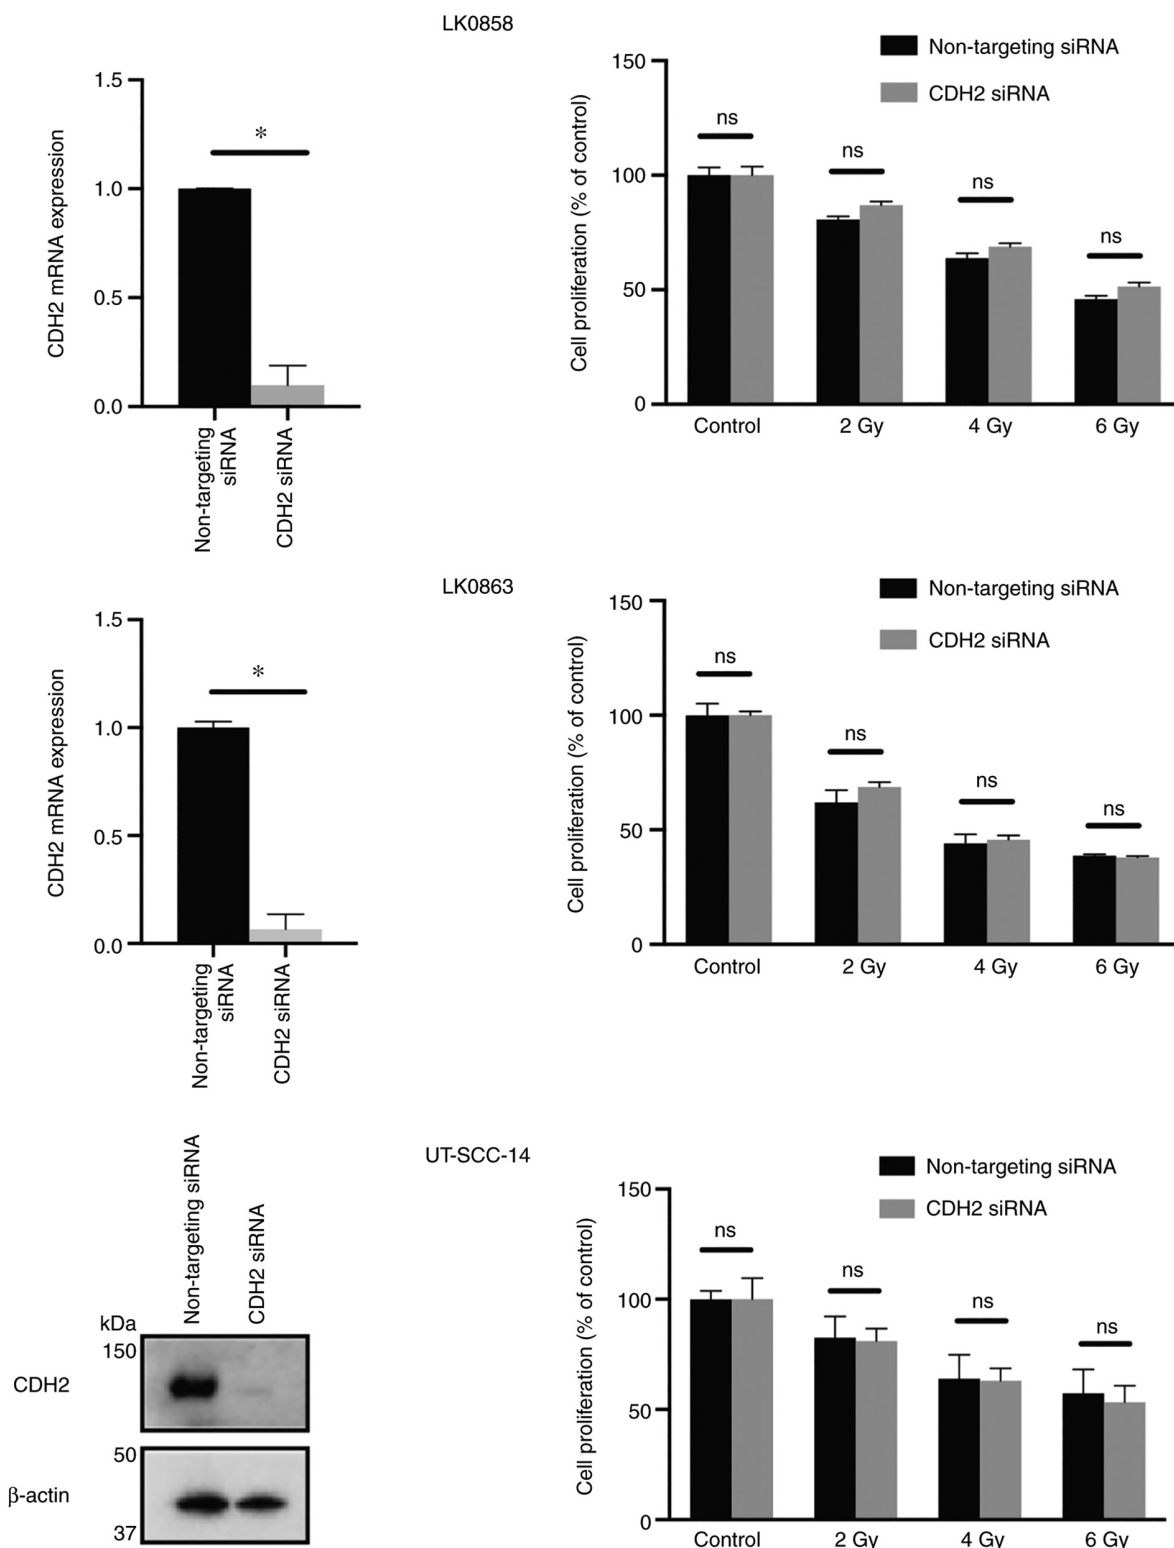

Figure S2. Ingenuity Pathway Analysis-predicted top regulator effector network. Upregulated and downregulated genes are shown in red and green, respectively. An asterisk indicates a gene that is represented in the dataset by >1 transcript.

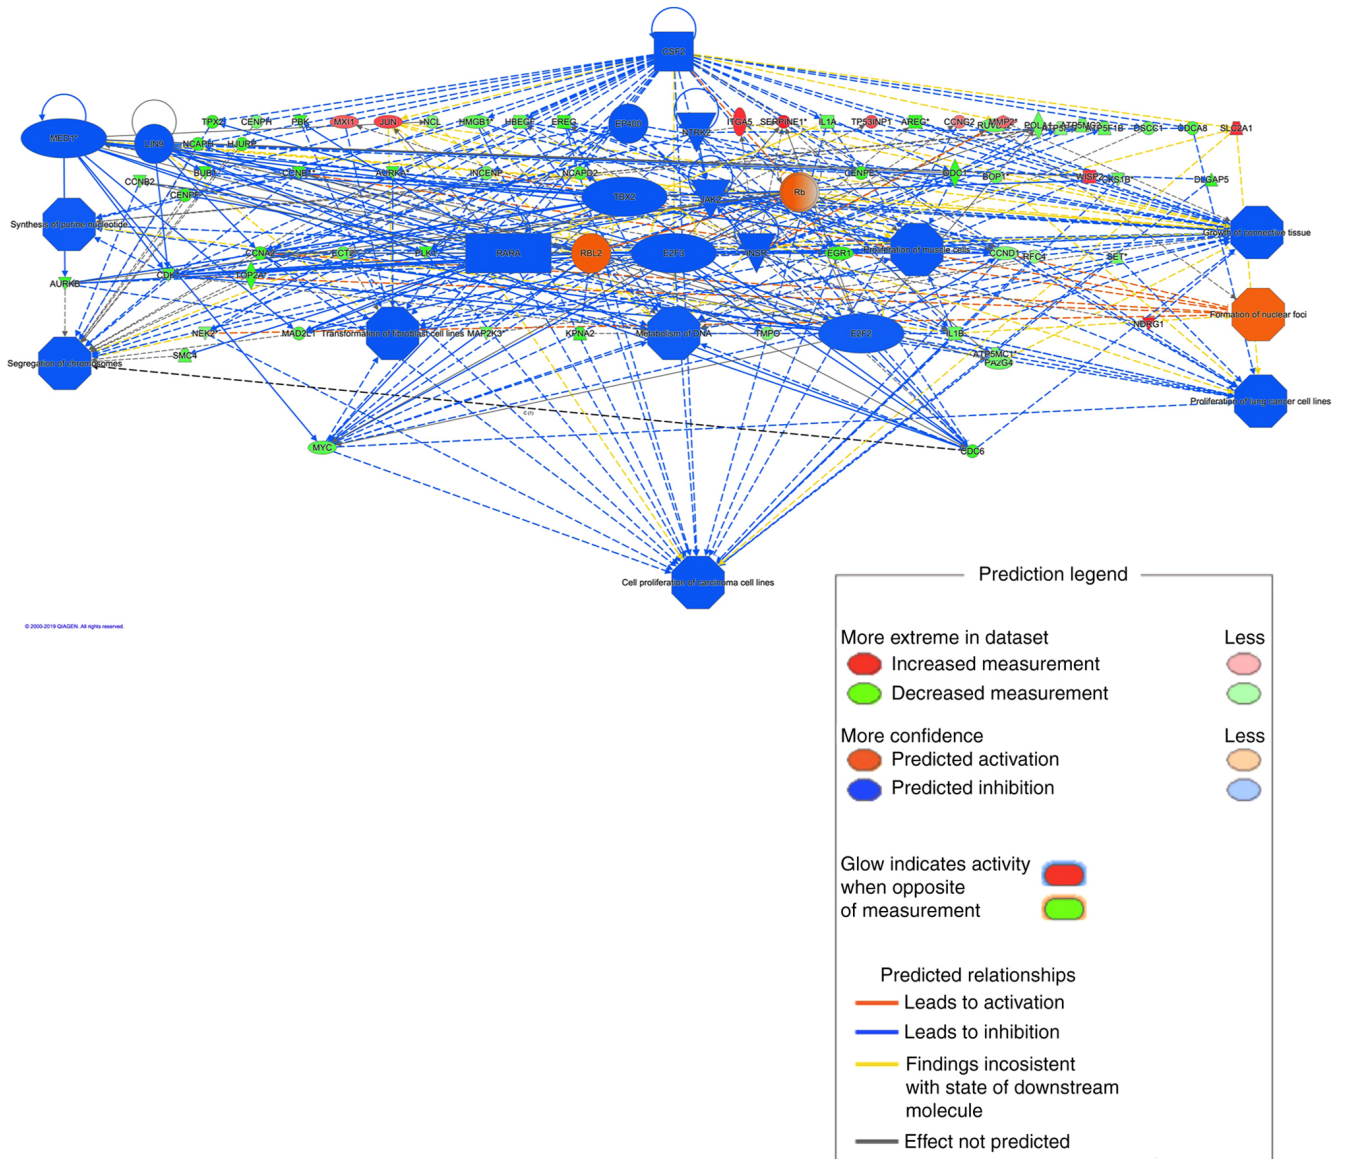

Table SI. List of siRNA target sequences used in the present study.

| FlexiTube siRNA           | Cat. no.   | Target sequence (5'→3') |
|---------------------------|------------|-------------------------|
| Human AREG_1              | SI00299845 | CAGAGTTGAACAGGTAGTTAA   |
| Human AREG_5              | SI03049683 | ATGATTGACAGTAGTTTATCA   |
| Human EREG_10             | SI04199244 | AACTGTATTTATTAACGCTTA   |
| Human HIF1A_5             | SI02664053 | AGGAAGAACTATGAACATAAA   |
| Human HIF1A_11            | SI04262041 | TCGGCGAAGTAAAGAATCTGA   |
| Human SERPINE_1           | SI00012628 | TTGGAGGACCTTTAGGTCAAA   |
| Human SERPINE_6           | SI03039715 | ACCGACATGTTTCAGACAGTTT  |
| Human CA9_3               | SI00023534 | CTGGCTGCTGGTGACATCCTA   |
| Human CA9_4               | SI00023541 | GAGGAGGATCTGCCAGTGAA    |
| Human CDH2_6              | SI02757335 | CAGATCGATATATGCAGCAAA   |
| Human CDH2_11             | SI04434619 | CAGGATCAGGTCTGATAGAGA   |
| AllStars Negative Control | 1027281    | Proprietary             |

All siRNAs were ordered from Qiagen GmbH. siRNA, small interfering RNA.
